# Supplementary material for: The 4D Reconstruction of Dynamic Geologic Processes for Renowned Geologic Features
Source: Copernicus journal article supplement (doi:10.5194/gmd-2023-1), 2023-03-06
Supplement: Supplementary file 1 [file gmd-2023-1-supplement.pdf]

## Principle of constructive parameterization

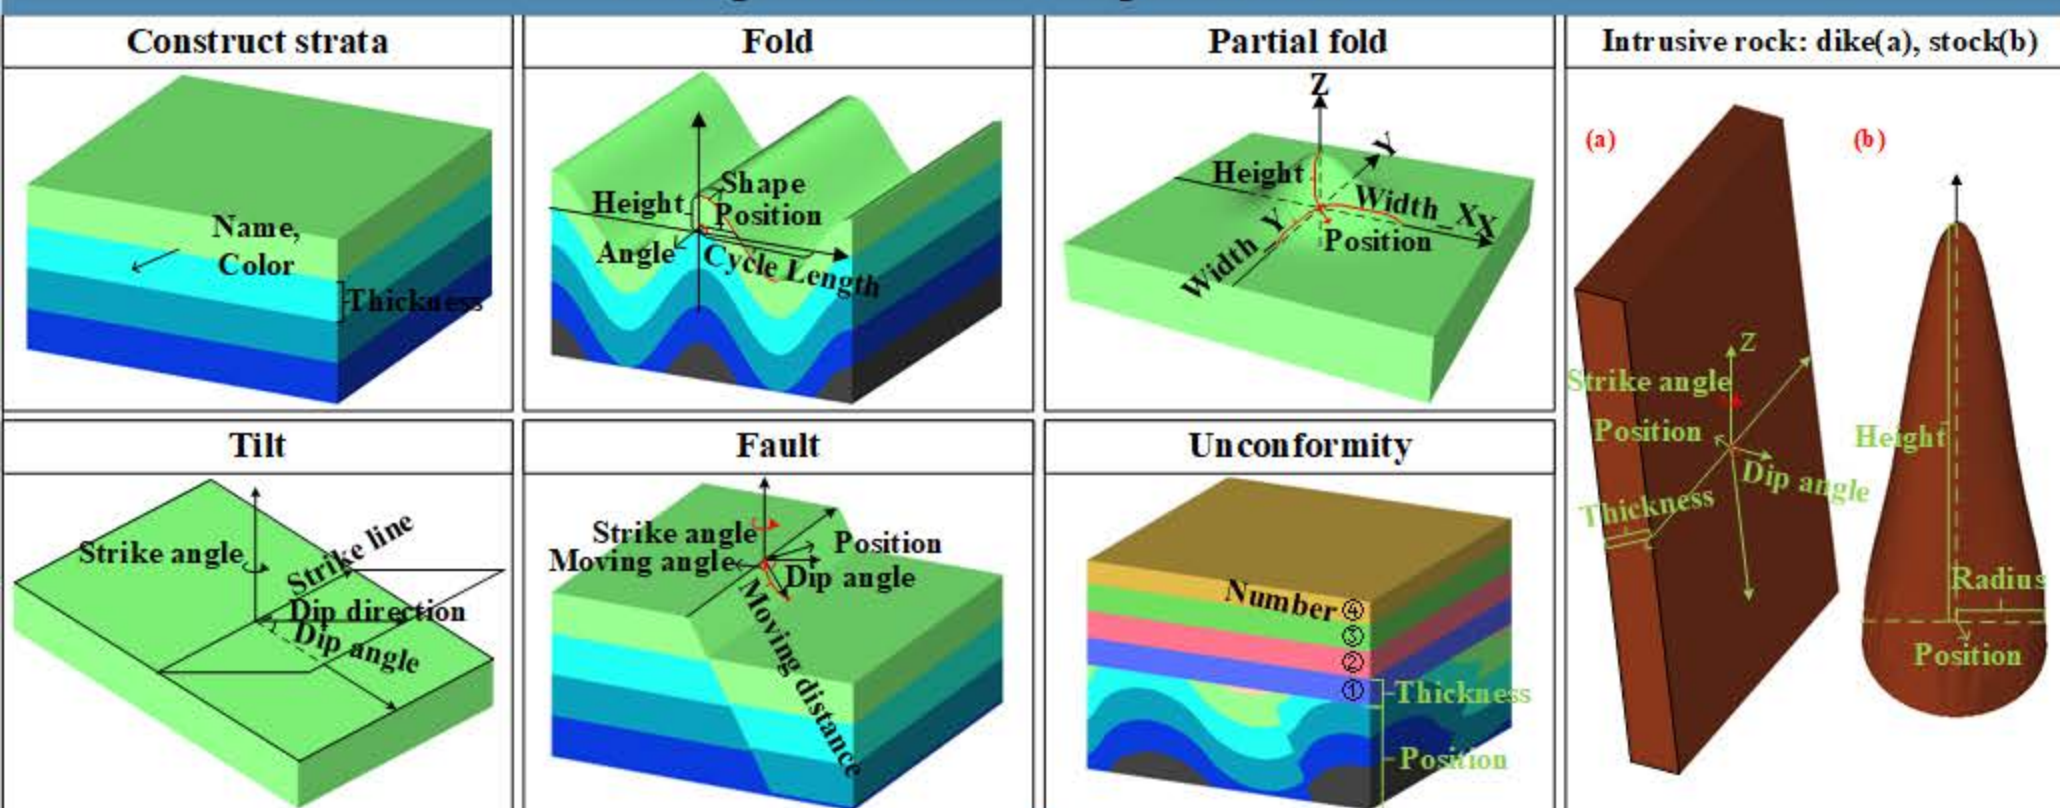

## Simulating the evolutionary process of wellknow geological features

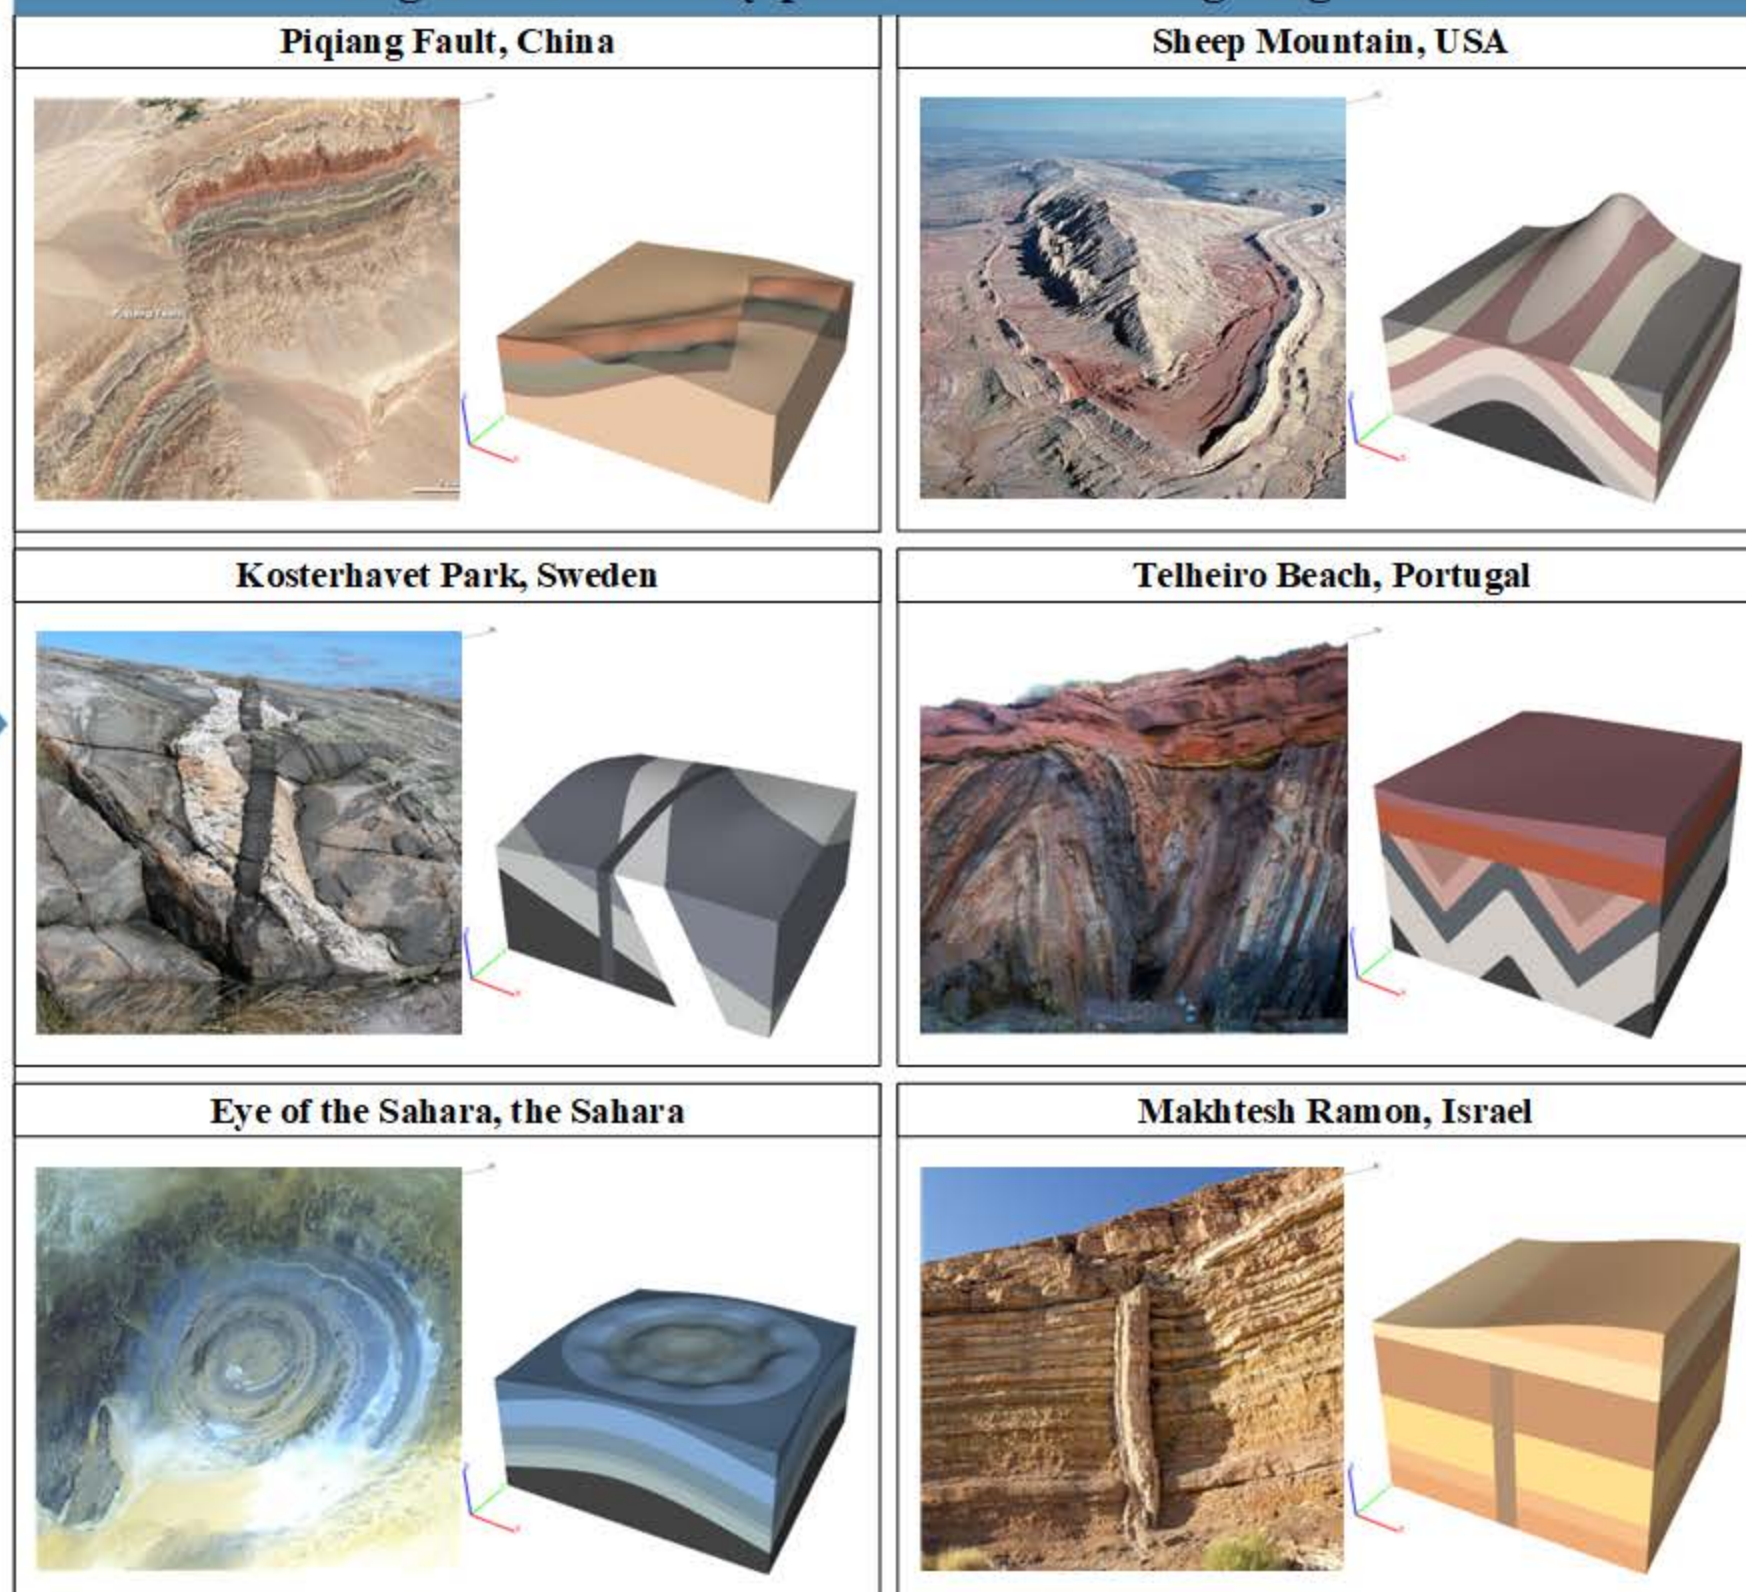

## Simulation of complex regional geological and structural evolutionary processes

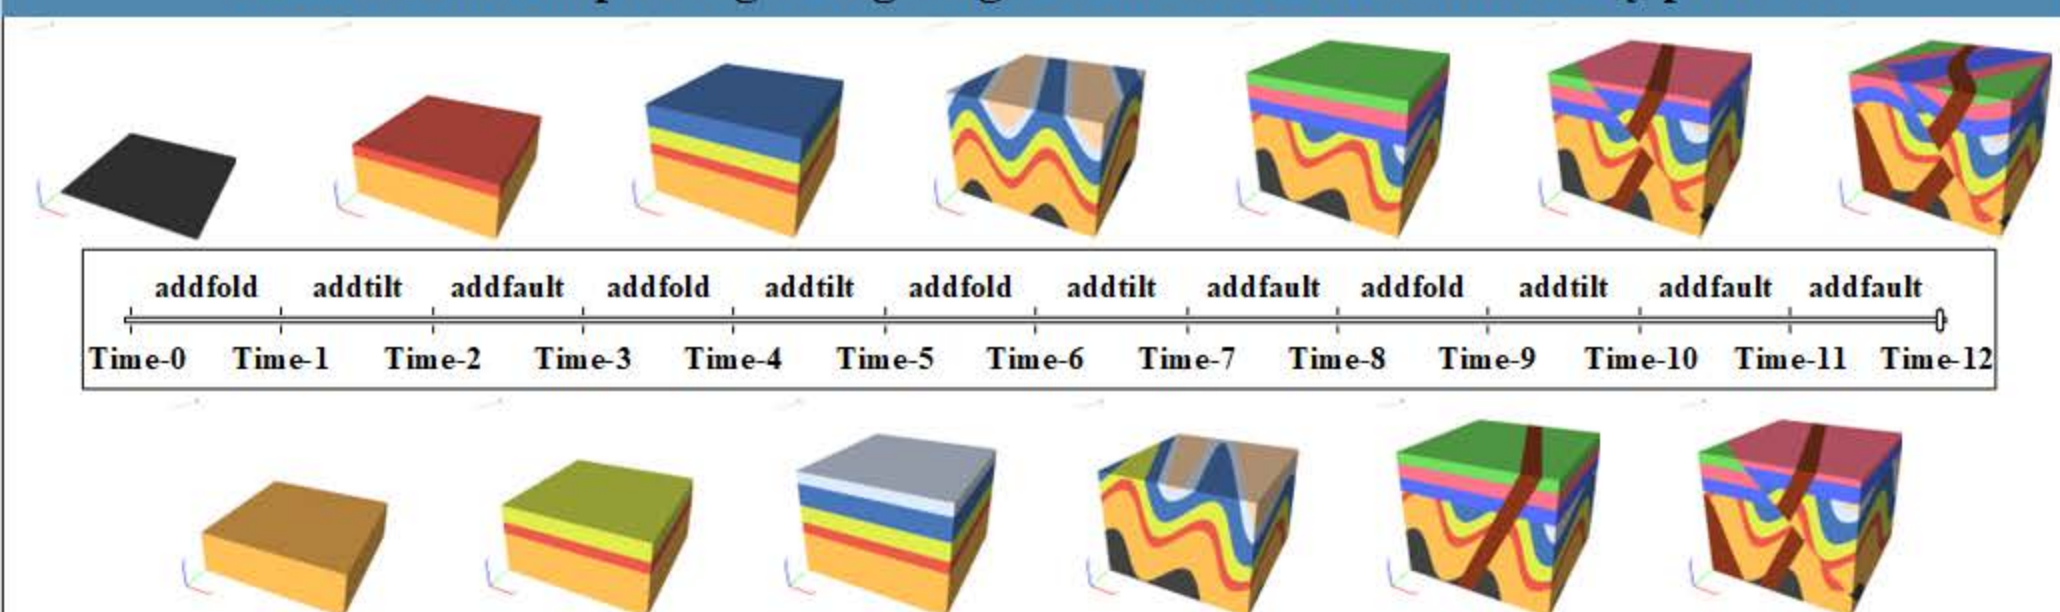

### Conclusion

- The 4D spatial and temporal evolution of regional geologic formations model that contains smooth boundaries can be established quickly using this method.
- The model can also dynamically present the regional geologic evolutionary process and reveal the interactions between structures over time via the timeline feature of the program.
- It is more convenient to add subsequent structures and provide additional detail to a single structure.
